# Supplementary material for: Reduction Effect of Carbon Emission Trading Policy in Decreasing PM2.5 Concentrations in China
Source: MDPI journal article supplement (doi:10.3390/ijerph192316208), 2022-12-03
Supplement: s1 [file s1]

## Supplementary Materials

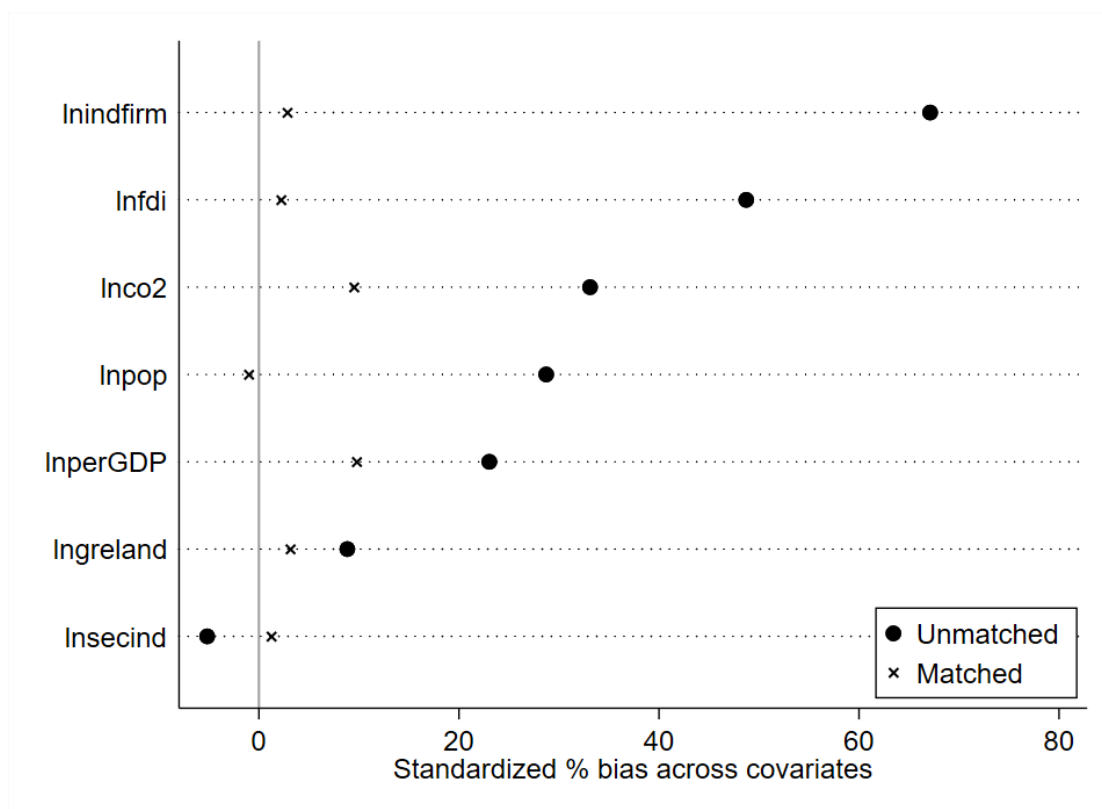

**Figure S1.** Standardized % bias across covariates between unmatched and matched observations.

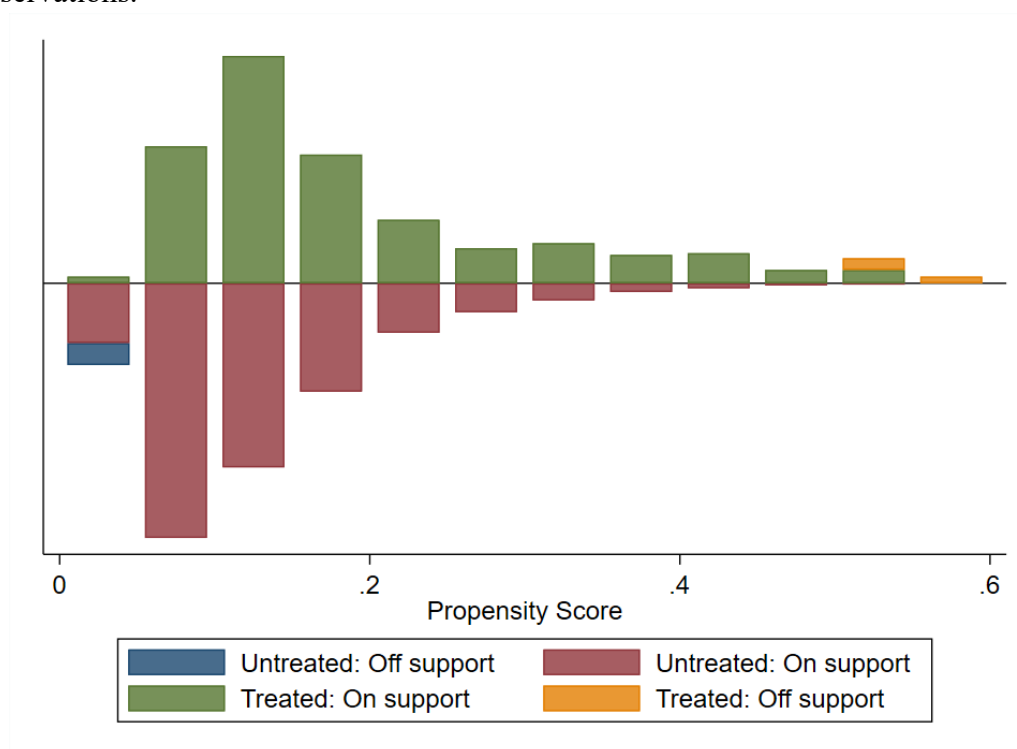

**Figure S2.** Common support between treated and untreated observations.

**Table S1.** Robustness of the effects of carbon trading in reducing PM<sub>2.5</sub> concentrations.

| Variable          | lnPM <sub>2.5</sub><br>(1) | PM <sub>2.5</sub> (winsor)<br>(2) |
|-------------------|----------------------------|-----------------------------------|
| ctspost           | -0.0950***<br>(0.0143)     | -3.1***<br>(0.6)                  |
| Controls          | YES                        | YES                               |
| City fixed-effect | YES                        | YES                               |
| Year fixed-effect | YES                        | YES                               |
| N                 | 3,258                      | 3,400                             |
| Adjusted R square | 0.9451                     | 0.9336                            |

Notes: Standard errors are clustered at the city level with robust standard errors in parentheses. “N” represents the number of observations. Significance levels: \*\*\*p<0.01.
